# Supplementary material for: Deep analysis of acquired resistance to FGFR1 inhibitor identifies MET and AKT activation and an expansion of AKT1 mutant cells
Source: PubMed Central journal article supplement (PMC6101141; doi:10.18632/oncotarget.25862), 2018-07-31
Supplement: oncotarget-09-31549-s001.pdf [file oncotarget-09-31549-s001.pdf]

# Deep analysis of acquired resistance to FGFR1 inhibitor identifies MET and AKT activation and an expansion of *AKT1* mutant cells

## SUPPLEMENTARY MATERIALS

### MATERIALS AND METHODS

#### Whole-exome and RNA sequencing data analysis for identifying variants specific to resistant cells

For RNA-sequencing (RNA-seq), reads were mapped to the human reference genome (hg19), with the GEM RNA-seq pipeline (<http://gemtools.github.io/>). Raw variant calls were manually checked with the Integrative Genomics Viewer (IGV; Broad Institute, Cambridge, MA). Gene quantification was performed with Flux Capacitor (<http://sammeth.net/confluence/display/FLUX/Home>). The TMM method [1] was used for normalization. Similarity among samples was inspected with a multi-dimensional scaling (MDS) plot. Genes with a  $>2$ -fold change and absolute difference of  $>5$  counts per million (cpm) were considered to be differentially expressed. The lists of upregulated and downregulated genes were functionally classified according to the Gene Ontology (GO) database. For RNA-seq, variant calling was performed with SAMtools [2] applying the same parameters as for WES. Variants were manually checked with the IGV [3]. For fusion, transcripts were found by applying TopHat-Fusion [4] with default settings.

In the WES data analysis, the reference genome was mapped using the GEM toolkit version 1, allowing up to four mismatches. Unmapped reads were then aligned using BFAST with less stringent settings. Alignment files (BAM format) were processed using Picard tools (<http://broadinstitute.github.io/picard/>) and the Genome Analysis Tool Kit (GATK). For variant calling of single nucleotide variants (SNVs) and short insertions and deletions (indels), we used SAMtools (version 0.1.19) with default settings. Variants were annotated with dbSNP (version 137) and dbNSFP (version 1.3 light). Further, functional annotations and variant effect categories were added by snpEff [5]. For missense and in-frame indel-type mutations, only expressed genes were selected.

We merged the WES copy number data with the gene expression data from RNA-seq to select regions with gene amplification (GA) and homozygous deletion (HD). These regions had to feature overexpression of GA

(defined as a level of expression at least 10 times that of a given gene in the cells carrying GA compared with the mean level of expression of cells without GA), or lack expression of HD, as previously described [6].

#### Global methylation microarray analysis

We used previously described protocols for global methylation microarray analysis [7]. For DNA methylation microarrays, all DNA samples were assessed for integrity, quantity and purity by electrophoresis in a 1.3% agarose gel and using PicoGreen quantification. 500 ng of genomic DNA was bisulfite-converted using an EZ DNA methylation kit (Zymo Research, Irvine, CA, USA). We used 200 ng of bisulfite-converted DNA for hybridization on the MethylationEPIC BeadChip (Illumina). Raw fluorescence intensity values were normalized with Illumina Genome Studio software (V2011.2) using 'control normalization' with background correction. Normalized intensities were then used to calculate DNA methylation levels (beta values). Likewise, values with low statistical power (indicated by detection values of  $P > 0.01$ ) were excluded from the analysis. Genotyping probes present on the chip and DNA methylation probes overlapping with known single-nucleotide polymorphisms were also removed. Probes were considered to be in a promoter CpG island if they were located within a CpG island (UCSC database) and  $<2,000$  bp away from a transcription start site (outside the X chromosome). Samples were clustered in an unsupervised manner using the 5,000 most variable values for CpG methylation according to the standard deviation for the CpG sites located in promoter regions by hierarchical clustering using the complete method for agglomerating the Manhattan distances.

### REFERENCES

1. Robinson MD, Oshlack A. A scaling normalization method for differential expression analysis of RNA-seq data. *Genome Biology*. 2010; 11:R25.
2. Li H, Handsaker B, Wysoker A, Fennell T, Ruan J, Homer N, Marth G, Abecasis G, Durbin R; 1000 Genome Project Data

- Processing Subgroup. The Sequence alignment/map (SAM) format and SAMtools. *Bioinformatics*. 2009; 25:2078–2079.
3. Robinson JT, Thorvaldsdóttir H, Winckler W, Guttman M, Lander ES, Getz G, Mesirov JP. Integrative genomics viewer. *Nat Biotechnol*. 2011; 29:24–6.
  4. Kim D, Salzberg SL. TopHat-Fusion: an algorithm for discovery of novel fusion transcripts. *Genome Biology*. 2011; 12:R72.
  5. Li H. A statistical framework for SNP calling, mutation discovery, association mapping and population genetical parameter estimation from sequencing data. *Bioinformatics*. 2011; 27:2987–2993.
  6. Pereira C, Gimenez-Xavier P, Pros E, Pajares MJ, Moro M, Gomez A, Navarro A, Condom E, Moran S, Gomez-Lopez G, Graña O, Rubio-Camarillo M, Martinez-Martí A, et al. Genomic profiling of patient-derived xenografts for lung cancer identifies B2M inactivation impairing immunorecognition. *Clin Cancer Res*. 2017; 23:3203–3213.
  7. Sandoval J, Heyn H, Moran S, Serra-Musach J, Pujana MA, Bibikova M. Validation of a DNA methylation microarray for 450,000 CpG sites in the human genome. *Epigenetics*. 2011; 6:692–702.

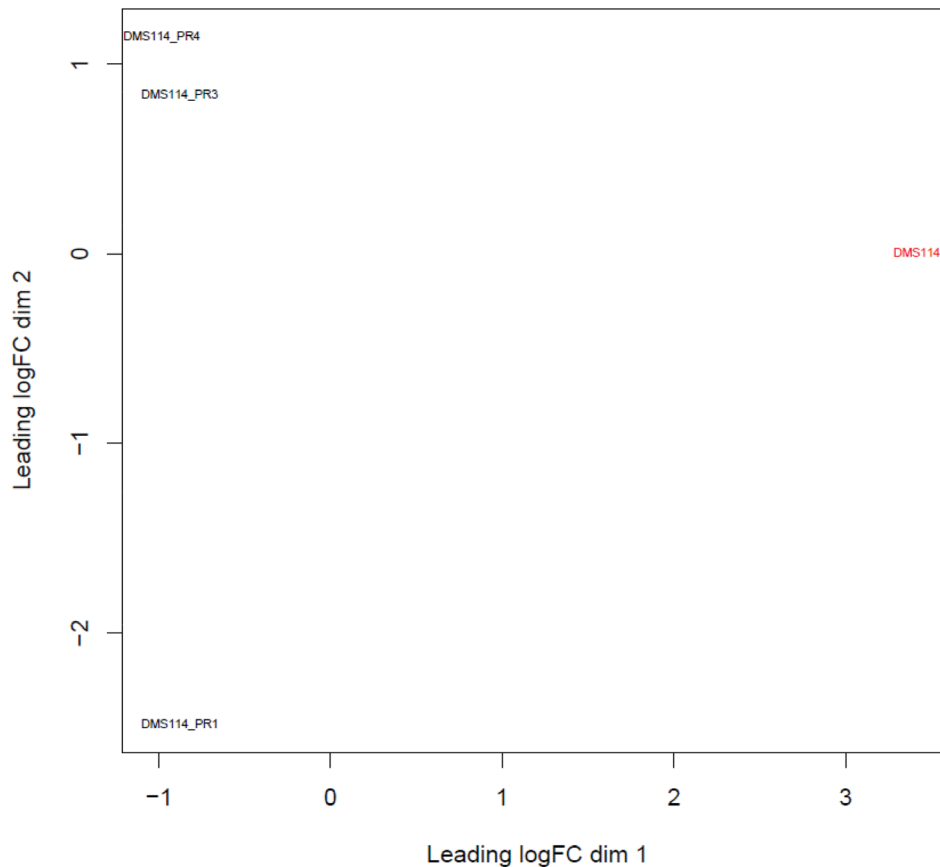

**Supplementary Figure 1: Multidimensional scaling plot of DMS114-P and the various DMS114-R cells.** dim = dimension; logFC = logarithm of n-fold change.

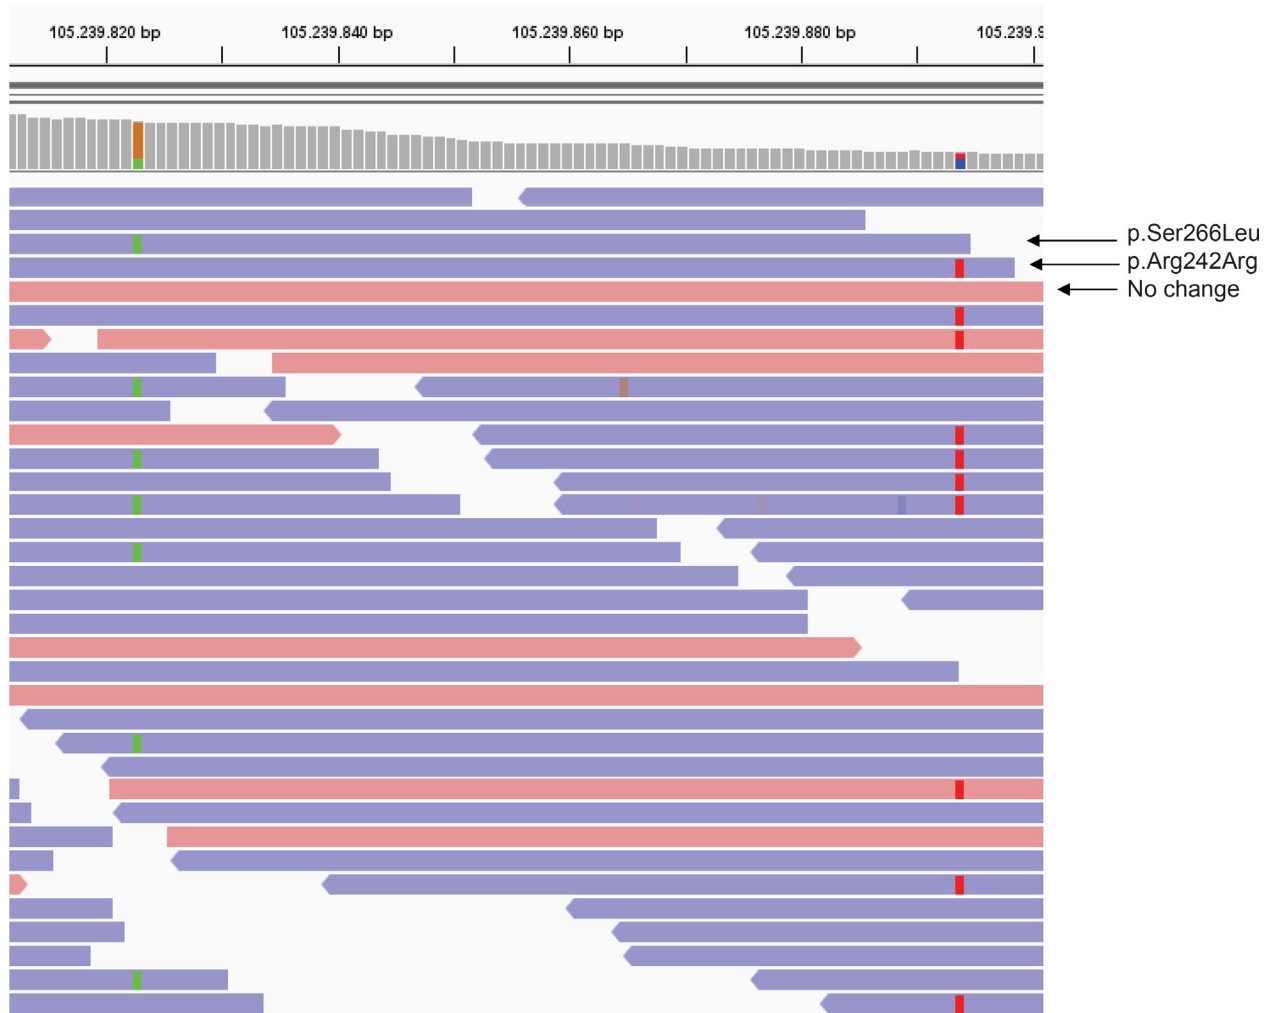

**Supplementary Figure 2: The S266L mutation and the R242R single nucleotide polymorphism at the *AKT1* gene in the DMS114-P cells, detected by whole-exome sequencing. Red and blue bars indicate positive and negative strands, respectively.**

**Supplementary Table 1: List of antibodies used in western blots and primer pairs used for qRT-PCRs**

| <b>Antibody</b>                | <b>Dilution</b> | <b>Source</b>                                |
|--------------------------------|-----------------|----------------------------------------------|
| beta-TUBULIN (HRP) (ab21058)   | 1: 10000        | Abcam (Cambridge, UK)                        |
| E-Cadherin (ab15148)           | 1: 1000         | Abcam (Cambridge, UK)                        |
| pEGFR-Y1068 (ab32430)          | 1: 1000         | Abcam (Cambridge, UK)                        |
| p120 (clone 98)                | 1: 1000         | BD Transduction Lab.<br>(San Diego, CA, USA) |
| AKT (#9272)                    | 1: 1000         | Cell Signaling (Danvers, MA, USA)            |
| pAKT-S473 (#9271)              | 1: 1000         | Cell Signaling (Danvers, MA, USA)            |
| pAKT-T308 (#9275)              | 1: 1000         | Cell Signaling (Danvers, MA, USA)            |
| EGFR D38B1 (#4267)             | 1: 1000         | Cell Signaling (Danvers, MA, USA)            |
| ERK (#9102)                    | 1: 1000         | Cell Signaling (Danvers, MA, USA)            |
| FGFR1 (D8E4, #9740),           | 1: 1000         | Cell Signaling (Danvers, MA, USA)            |
| MET (25H2) (#3127)             | 1: 1000         | Cell Signaling (Danvers, MA, USA)            |
| pMET-Y1234/Y1235 (#3126)       | 1: 1000         | Cell Signaling (Danvers, MA, USA)            |
| pS6-S235/236 (#4856)           | 1: 1000         | Cell Signaling (Danvers, MA, USA)            |
| S6 (#2217)                     | 1: 1000         | Cell Signaling (Danvers, MA, USA)            |
| Vimentin (CBL-202K)            | 1: 1000         | Merck Millipore                              |
| beta-ACTIN (HRP, A3854)        | 1: 10000        | Sigma-Aldrich                                |
| pERK-T183/Y185 (clone MAPK-YT) | 1: 1000         | Sigma-Aldrich                                |
| pFGFR (Tyr653/654) (#3471)     | 1: 1000         | Cell Signaling (Danvers, MA, USA)            |
| GSK3B (ab93926)                | 1: 1000         | Abcam (Cambridge, UK)                        |
| pGSK3B (S9) (#9323)            | 1: 500          | Cell Signaling (Danvers, MA, USA)            |

  

| <b>Gene</b>   | <b>Forward primer (5'-3')</b> | <b>Reverse primer (5'-3')</b> |
|---------------|-------------------------------|-------------------------------|
| <i>ABI3BP</i> | AGTTCTTGCGTCCAAGTCCA          | GGAGCAGGTTCGCACAACCTAT        |
| <i>ACTB</i>   | CAAGGCCAACCGCGAGAAGAT         | CCAGAGGCGTACAGGGATAGCAC       |
| <i>MET</i>    | ATGATGAGGTGGACACACGA          | CCATTGGACAAAGTGTGGACT         |
| <i>EMP1</i>   | AACATGTTGGTATTGCTGGCT         | AGTTTTTCCAAAGACCTACTGAT       |
| <i>SNX7</i>   | AAATCTCAGGTATTCCAGGTCAC       | ATGCAATTATTGGCACACAAA         |
| <i>PHLDA1</i> | GTTGAGGAGTCTGTTGGGGG          | CAGCCCCAAGAGGACTTTGTAT        |

**Supplementary Table 2: List of genes upregulated and downregulated in DMS114-R relative to DMS114-P cells. See Supplementary\_Table\_2**

**Supplementary Table 3: Whole-exome sequencing depth and coverage report**

| Sample name | Million read-pairs | Yield (Gb) | Reference genome    | % uniquely mapping | % unmapped | Mean coverage | Coverage at depth 10 | Coverage at depth |
|-------------|--------------------|------------|---------------------|--------------------|------------|---------------|----------------------|-------------------|
| DMS114      | 36.017             | 7.276      | hsapiens.<br>hs37d5 | 96.5               | 0.8        | 104.19        | 94.4                 | 81.34             |
| DMS114-PR1  | 34.734             | 7.016      | hsapiens.<br>hs37d5 | 96.5               | 0.77       | 100.51        | 94.23                | 80.8              |
| DMS114-PR3  | 36.256             | 7.324      | hsapiens.<br>hs37d5 | 96.47              | 0.81       | 105.23        | 94.38                | 81.42             |
| DMS114-PR4  | 36.949             | 7.464      | hsapiens.<br>hs37d5 | 96.41              | 0.84       | 103.13        | 95.22                | 82.45             |

**Supplementary Table 4: Selection of regions and genes with increase or decrease in copy number**

| ID         | Peak region               | Genes within regions with increased copy number                                               | MEAN FC |
|------------|---------------------------|-----------------------------------------------------------------------------------------------|---------|
| DMS114-PR1 | chr11: 3051684-332126017  | <i>DCDC1, DNAJC24, IMMP1L, ELP4, PAX6, RCNI</i>                                               | 2.4     |
| DMS114-PR3 | chr11: 3051684-332126017  | <i>DCDC1, DNAJC24, IMMP1L, ELP4, PAX6, RCNI</i>                                               | 2.9     |
| DMS114-PR4 | chr11: 3051684-332126017  | <i>DCDC1, DNAJC24, IMMP1L, ELP4, PAX6, RCNI</i>                                               | 3.1     |
| DMS114-PR1 | chr11: 35160851-36669704  | <i>CD44, SLC1A2, PAMR1, FJX1, TRIM44, LDLRAD3, COMMD9, PRR5L, TRAF6, RAG1, RAG2, C11orf74</i> | 2.1     |
| DMS114-PR3 | chr11: 35160851-36669704  | <i>CD44, SLC1A2, PAMR1, FJX1, TRIM44, LDLRAD3, COMMD9, PRR5L, TRAF6, RAG1, RAG2, C11orf74</i> | 2.4     |
| DMS114-PR4 | chr11: 35160851-36669704  | <i>CD44, SLC1A2, PAMR1, FJX1, TRIM44, LDLRAD3, COMMD9, PRR5L, TRAF6, RAG1, RAG2, C11orf74</i> | 2.4     |
| DMS114-PR3 | chr13:103249389-106118680 | <i>TPP2, METTL21C, C13orf27, KDELC1, BIVM, ERCC5, SLC10A2,</i>                                | 2.4     |
| DMS114-PR3 | chrX: 18274968-22292385   | <i>From SCML2 to ZNF645</i>                                                                   | 2.3     |
| DMS114-PR1 | chrX: 96502714-114882336  | <i>From DIAPH2 to PLS3</i>                                                                    | 2.2     |
| ID         | Peak region               | Genes within regions with decreased copy number                                               | MEAN FC |
| DMS114-PR1 | chr4: 75673251-79518567   | <i>From BTC to ANXA3</i>                                                                      | 0.48    |
| DMS114-PR1 | chrY                      | all genes                                                                                     | 0       |
| DMS114-PR3 | chrY                      | all genes                                                                                     | 0       |
| DMS114-PR4 | chrY                      | all genes                                                                                     | 0       |

Only regions with mean n-fold change (FC) >2 (increased copy number) or <0.5 (decreased copy number) were selected.

**Supplementary Table 5: List of fusions found in the different cells**

| CELL ID    | Gene 1                 | CHROMOSOME | POSITION  | Gene 2                 | CHROMOSOME | POSITION  |
|------------|------------------------|------------|-----------|------------------------|------------|-----------|
| DMS114     | <i>ZFAND3</i>          | chr6       | 37897774  | <i>C6orf89</i>         | chr6       | 36882059  |
| DMS114     | <i>KLHL15</i>          | chrX       | 24012796  | <i>EIF2S3</i>          | chrX       | 24078298  |
| DMS114     | <i>KLHL15</i>          | chrX       | 24024423  | <i>EIF2S3</i>          | chrX       | 24078298  |
| DMS114     | <i>SUDS3</i>           | chr12      | 118825300 | <i>ENSG00000249129</i> | chr5       | 177398635 |
| DMS114_PR1 | <i>ZFAND3</i>          | chr6       | 37897773  | <i>C6orf89</i>         | chr6       | 36882058  |
| DMS114_PR1 | <i>HYAL2</i>           | chr3       | 50356386  | <i>TMEM115</i>         | chr3       | 50392977  |
| DMS114_PR1 | <i>IMMP1L</i>          | chr11      | 31480752  | <i>PAMR1</i>           | chr11      | 35454198  |
| DMS114_PR1 | <i>DCDC5</i>           | chr11      | 30942931  | <i>CD44</i>            | chr11      | 35236460  |
| DMS114_PR1 | <i>DENND5A</i>         | chr11      | 9241081   | <i>IPO7</i>            | chr11      | 9406393   |
| DMS114_PR1 | <i>ENSG00000250859</i> | chr5       | 126847434 | <i>HNRNPK</i>          | chr9       | 86585718  |
| DMS114_PR1 | <i>ENSG00000226505</i> | chr2       | 70329652  | <i>MRPL36</i>          | chr5       | 1799905   |
| DMS114_PR1 | <i>TEX101</i>          | chr19      | 43905187  | <i>ARL8B</i>           | chr3       | 5222492   |
| DMS114_PR3 | <i>ZFAND3</i>          | chr6       | 37897774  | <i>C6orf89</i>         | chr6       | 36882059  |
| DMS114_PR3 | <i>ATP9A</i>           | chr20      | 50286535  | <i>ZFP64</i>           | chr20      | 50715125  |
| DMS114_PR3 | <i>DCDC5</i>           | chr11      | 30942931  | <i>CD44</i>            | chr11      | 35236460  |
| DMS114_PR3 | <i>ATP6VIC1</i>        | chr8       | 104063371 | <i>ENSG00000253320</i> | chr8       | 103989814 |
| DMS114_PR3 | <i>ORC3</i>            | chr6       | 88321965  | <i>ENSG00000254471</i> | chr11      | 79699535  |
| DMS114_PR3 | <i>ENSG00000226505</i> | chr2       | 70329652  | <i>MRPL36</i>          | chr5       | 1799905   |
| DMS114_PR3 | <i>TEX101</i>          | chr19      | 43905187  | <i>ARL8B</i>           | chr3       | 5222492   |
| DMS114_PR4 | <i>ZFAND3</i>          | chr6       | 37897773  | <i>C6orf89</i>         | chr6       | 36882058  |
| DMS114_PR4 | <i>HYAL2</i>           | chr3       | 50356386  | <i>TMEM115</i>         | chr3       | 50392977  |
| DMS114_PR4 | <i>HMGA2</i>           | chr12      | 66232348  | <i>TBK1</i>            | chr12      | 64868009  |
| DMS114_PR4 | <i>DCDC5</i>           | chr11      | 30942931  | <i>CD44</i>            | chr11      | 35236460  |
| DMS114_PR4 | <i>ATP6VIC1</i>        | chr8       | 104063371 | <i>ENSG00000253320</i> | chr8       | 103989814 |
| DMS114_PR4 | <i>CTBP2</i>           | chr10      | 126799558 | <i>WLS</i>             | chr1       | 68628714  |
| DMS114_PR4 | <i>ENSG00000250859</i> | chr5       | 126847434 | <i>HNRNPK</i>          | chr9       | 86585718  |
| DMS114_PR4 | <i>ENSG00000226505</i> | chr2       | 70329652  | <i>MRPL36</i>          | chr5       | 1799905   |
| DMS114_PR4 | <i>TEX101</i>          | chr19      | 43905187  | <i>ARL8B</i>           | chr3       | 5222492   |

**Supplementary Table 6: Overview of the coding and nonsynonymous SNVs, found in at least 10% of reads, in at least one of the DMS114-R cells, compared with the DMS114-P. See Supplementary\_Table\_6****Supplementary Table 7: List of the 5,000 genes with the most variable methylation values at CpG sites. See Supplementary\_Table\_7**
